# Supplementary material for: A magnetic surface-enhanced Raman scattering platform for performing successive breast cancer exosome isolation and analysis
Source: Royal Society of Chemistry journal article supplement (doi:10.1039/d0tb02894k), 2021-01-01
Supplement: d0tb02894k1.pdf [file d0tb02894k1.pdf]

## A magnetic surface enhanced Raman scattering platform performing successive breast cancer exosome isolation and analysis

Guohao Li <sup>a</sup>, Nanhang Zhu <sup>a</sup>, Juan Zhou <sup>b</sup>, Ke Kang <sup>a</sup>, Xiaoxi Zhou <sup>a</sup>, Binwu Ying <sup>b</sup>, Qiangying Yi <sup>a\*</sup> and Yao Wu <sup>a\*</sup>

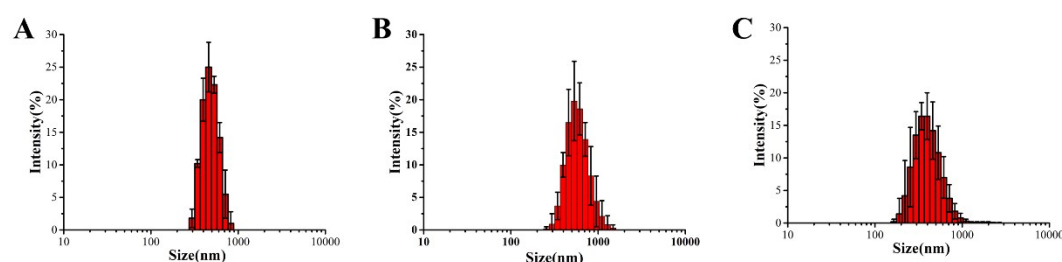

Figure S1. The change of particles size distribution during the modification of magnetic nanoparticles and the growth of gold nano-dots. The size distribution of MNPs (A), MNPs@PEI@MUA (B), and MNPs@Au (C). In this process, the particle size of magnetic nanoparticles gradually increased, from  $256 \pm 10.8$  nm to  $305.2 \pm 29.5$  nm after PEI and MUA modification, and finally to  $359.6 \pm 11.68$  nm after the gold nano-dots growth.

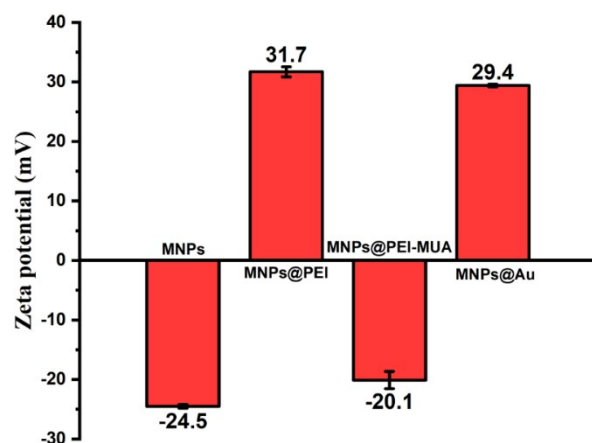

Figure S2. Zeta potential changes during modification of magnetic nanoparticles and growth of gold nano-dots.

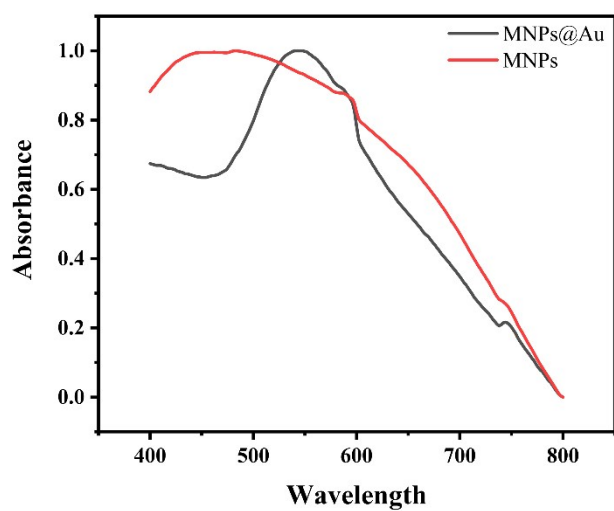

Figure S3. UV-vis absorption spectra of the MNPs and MNPs@Au.

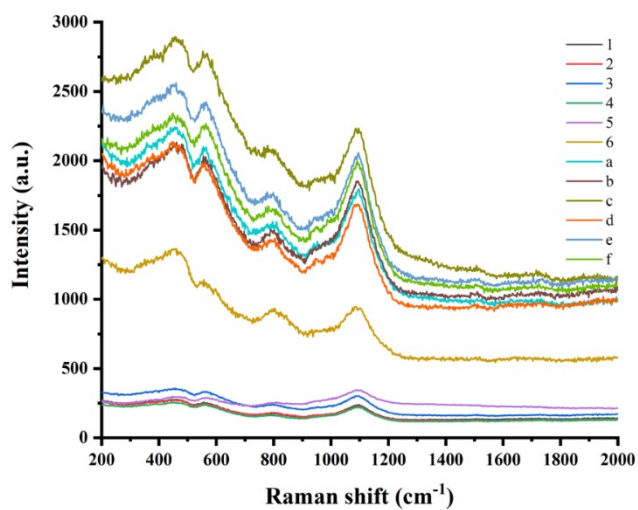

Figure S4. SERS curves of the two kinds of exosomes. Exosomes secreted by MCF-7 breast cancer cell lines (1 - 6) and MDA-MB-231 breast cancer cell lines (a - f).

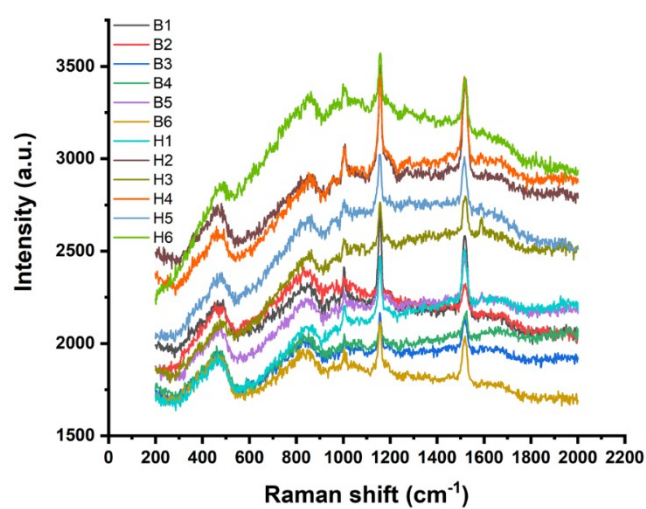

Figure S5. SERS results of serum exosomes derived from breast cancer patients (B1 – B14) and healthy people (H1 - H6).

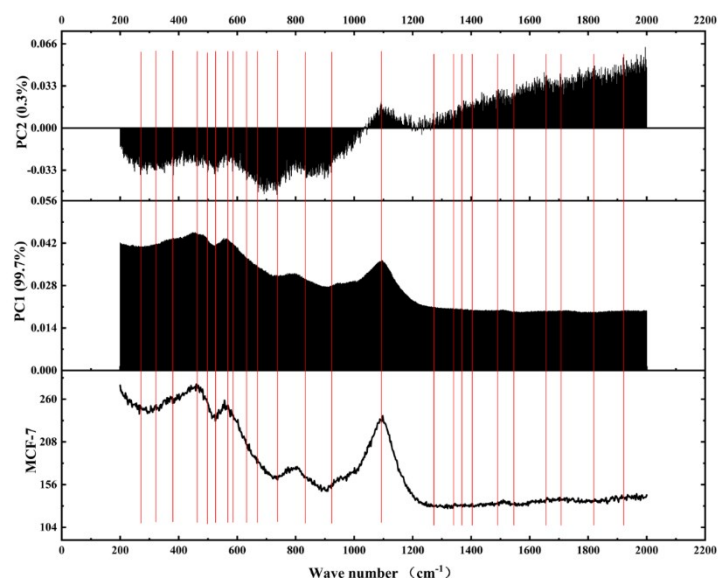

Figure S6. Loading with Reference Spectrum Plot of two pure exosomes.

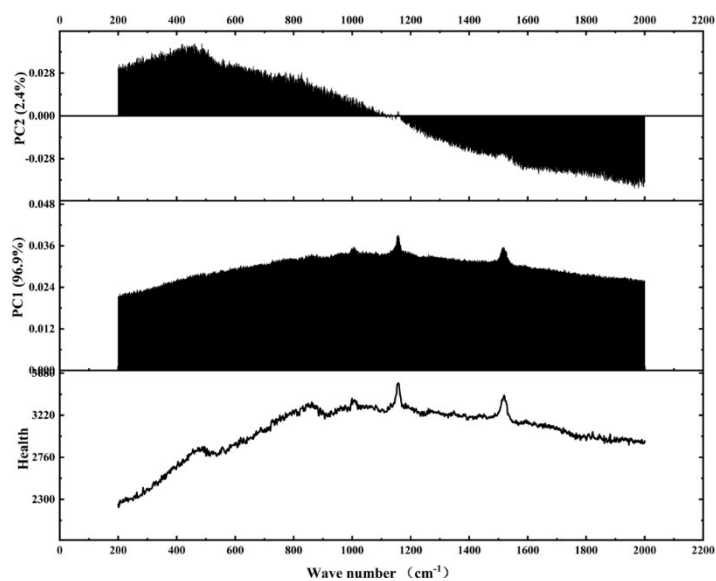

Figure S7. Loading with Reference Spectrum Plot of serum samples.

Table. S1 Information of the healthy donors and breast cancer patients.

| Serial number | Gender | Age          | Physical condition |
|---------------|--------|--------------|--------------------|
| B1            | women  | 49 years old | Breast cancer      |
| B2            | women  | 48 years old | Breast cancer      |
| B3            | women  | 69 years old | Breast cancer      |
| B4            | women  | 85 years old | Breast cancer      |
| B5            | women  | 64 years old | Breast cancer      |
| B6            | women  | 50 years old | Breast cancer      |
| B7            | women  | 79 years old | Breast cancer      |
| B8            | women  | 41 years old | Breast cancer      |
| B9            | women  | 52 years old | Breast cancer      |
| B10           | women  | 43 years old | Breast cancer      |
| B11           | women  | 45 years old | Breast cancer      |
| B12           | women  | 72 years old | Breast cancer      |
| B13           | women  | 47 years old | Breast cancer      |
| B14           | women  | 47 years old | Breast cancer      |
| N1            | women  | 60 years old | health             |
| N2            | women  | 45 years old | health             |
| N3            | women  | 28 years old | health             |
| N4            | women  | 50 years old | health             |
| N5            | women  | 36 years old | health             |
| N6            | women  | 56 years old | health             |
